# Supplementary material for: The Identification of Streptococcus pasteurianus Obtained from Six Regions in China by Multiplex PCR Assay and the Characteristics of Pathogenicity and Antimicrobial Resistance of This Zoonotic Pathogen
Source: MDPI journal article supplement (doi:10.3390/pathogens12040615), 2023-04-18
Supplement: s1 [file s1]

Table S4. The predicted virulence factors in strains WUSP070 and WUSP074

| Gene ID       | Start   | End     | Length | Strand | Annotation                                                                 |
|---------------|---------|---------|--------|--------|----------------------------------------------------------------------------|
| WUSP070       |         |         |        |        |                                                                            |
| M0P24_RS00375 | 69330   | 70343   | 1014   | +      | dTDP-glucose 4,6-dehydratase                                               |
| M0P24_RS03135 | 604385  | 605693  | 1299   | +      | PssD/Cps14F family polysaccharide biosynthesis glycosyltransferase dTDP-4- |
| M0P24_RS03425 | 675712  | 676566  | 855    | +      | dehydrorhamnose 3,5-epimerase family protein                               |
| M0P24_RS03440 | 678853  | 679659  | 807    | +      | phosphopyruvate hydratase                                                  |
| M0P24_RS03445 | 679659  | 680870  | 1212   | +      | glucose-1-phosphate thymidyltransferase RfbA                               |
| M0P24_RS05770 | 1142023 | 1142520 | 498    | -      | glycosyltransferase dTDP-4-                                                |
| M0P24_RS05775 | 1142532 | 1143008 | 477    | -      | dehydrorhamnose reductase                                                  |
| M0P24_RS05815 | 1149837 | 1150745 | 909    | +      | trigger factor                                                             |
| M0P24_RS06415 | 1268062 | 1269111 | 1050   | -      | ABC transporter permease                                                   |
| M0P24_RS06420 | 1269286 | 1269879 | 594    | -      | UTP--glucose-1-phosphate uridyltransferase GalU                            |
| M0P24_RS06425 | 1269879 | 1270748 | 870    | -      | type I glyceraldehyde-3-phosphate dehydrogenase                            |
| M0P24_RS09160 | 1805305 | 1806588 | 1284   | -      | ABC transporter ATP-binding protein                                        |
| M0P24_RS10995 | 2140907 | 2141821 | 915    | +      | LysR family transcriptional regulator                                      |
| WUSP074       |         |         |        |        |                                                                            |
| M0P28_RS01700 | 294896  | 296179  | 1284   | +      | dTDP-glucose 4,6-dehydratase                                               |
| M0P28_RS04060 | 768445  | 769314  | 870    | +      | GbpC/Spa domain-containing protein                                         |
| M0P28_RS04065 | 769314  | 769907  | 594    | +      | dTDP-4-dehydrorhamnose 3,5-                                                |

| Gene ID       | Start   | End     | Length | Strand | Annotation                                                  |
|---------------|---------|---------|--------|--------|-------------------------------------------------------------|
| M0P28_RS04070 | 770082  | 771131  | 1050   | +      | epimerase family<br>protein<br>phosphopyruvate<br>hydratase |
| M0P28_RS04195 | 799732  | 801387  | 1656   | -      | glucose-1-phosphate<br>thymidyltransferase<br>RfbA          |
| M0P28_RS04645 | 890694  | 891602  | 909    | -      | dTDP-4-<br>dehydrorhamnose<br>reductase                     |
| M0P28_RS07390 | 1443721 | 1444527 | 807    | -      | trigger factor                                              |
| M0P28_RS07405 | 1446814 | 1447668 | 855    | -      | ABC transporter<br>permease                                 |
| M0P28_RS07950 | 1555210 | 1560105 | 4896   | -      | UTP--glucose-1-<br>phosphate<br>uridylyltransferase<br>GalU |
| M0P28_RS08135 | 1596129 | 1597427 | 1299   | -      | type I glyceraldehyde-<br>3-phosphate<br>dehydrogenase      |
| M0P28_RS10980 | 2165137 | 2166150 | 1014   | -      | LysR family<br>transcriptional<br>regulator                 |
| M0P28_RS11380 | 2233620 | 2234534 | 915    | +      | NFACT RNA binding<br>domain-containing<br>protein           |
