# Supplementary material for: The Identification of Streptococcus pasteurianus Obtained from Six Regions in China by Multiplex PCR Assay and the Characteristics of Pathogenicity and Antimicrobial Resistance of This Zoonotic Pathogen
Source: MDPI journal article supplement (doi:10.3390/pathogens12040615), 2023-04-18
Supplement: s1 [file s1]

Table S2. The list of animal cases infected by *S. pasteurianus*

| Country | Time of publication | Animal          | Symptoms                         | References |
|---------|---------------------|-----------------|----------------------------------|------------|
| America | 2014                | turkey poult    | acute septicemia                 | [19]       |
| Austria | 2021                | goslings        | central nervous symptoms         | [17]       |
| Brazil  | 2022                | emperor tamarin | valvular endocarditis and sepsis | [21]       |
| Britain | 2008                | goslings        | septicemia                       | [16]       |
| China   | 2013                | ducklings       | meningitis                       | [18]       |
|         | 2022                | piglet          | meningitis                       | [22]       |
| Italy   | 2019                | calves          | neurological symptoms            | [20]       |
