# Supplementary material for: The Identification of Streptococcus pasteurianus Obtained from Six Regions in China by Multiplex PCR Assay and the Characteristics of Pathogenicity and Antimicrobial Resistance of This Zoonotic Pathogen
Source: MDPI journal article supplement (doi:10.3390/pathogens12040615), 2023-04-18
Supplement: s1 [file s1]

Table S1. The list of human cases infected by *S. pasteurianus*

| Country     | Time of publication | Patient         | Symptom                                                | References |
|-------------|---------------------|-----------------|--------------------------------------------------------|------------|
| America     | 2000                | infant          | meningitis                                             | [38]       |
|             | 2003                | neonate         | meningitis                                             | [7]        |
|             | 2010                | adult           | meningitis                                             | [39]       |
|             | 2012                | neonate         | meningitis                                             | [23]       |
|             | 2013                | adult           | septicemia                                             | [19]       |
|             | 2015                | twin<br>infants | sepsis and meningitis                                  | [9]        |
|             | 2016                | adult           | bacteremia                                             | [15]       |
|             | 2019                | neonate         | meningitis, endocarditis,<br>and pneumonitis           | [40]       |
|             | 2021                | infant          | ductal stent endocarditis                              | [5]        |
|             | 2022                | infants         | bacteremia and/or<br>meningitis                        | [41]       |
| Argentina   | 2013                | child           | meningitis and bacteremia                              | [42]       |
| Australia   | 2018                | adult           | meningitis                                             | [43]       |
| Britain     | 2010                | adult           | meningitis                                             | [6]        |
| China       | 2013                | adult           | intrauterine infection and<br>post-partum bacteraemia  | [8]        |
|             |                     | adult           | splenic abscess                                        | [11]       |
|             | 2019                | adults          | bacteremia, infective<br>endocarditis, meningitis, etc | [26]       |
|             | 2021                | neonates        | bacteremia and meningitis                              | [44]       |
|             | 2023                | neonates        | sepsis                                                 | [25]       |
| Costa Rica  | 2021                | infant          | meningitis                                             | [45]       |
| France      | 2010                | neonates        | bloodstream infections                                 | [24]       |
|             | 2016                | neonates        | sepsis, necrotizing<br>enterocolitis                   | [14]       |
| Japan       | 2009                | adult           | bacterial peritonitis                                  | [12]       |
|             |                     | neonate         | meningitis                                             | [46]       |
|             | 2012                | neonate         | meningitis                                             | [47]       |
|             | 2014                | infant          | meningitis                                             | [48]       |
|             |                     | adult           | infective endocarditis                                 | [49]       |
|             | 2018                | neonate         | meningitis                                             | [50]       |
|             | 2022                | adult           | bacteremia                                             | [51]       |
|             |                     | adult           | acute calculous cholecystitis                          | [52]       |
| Korea       | 2015                | neonate         | bacteremia and meningitis                              | [53]       |
| Netherlands | 2015                | adult           | meningitis                                             | [54]       |
| Portugal    | 2023                | adult           | endocarditis                                           | [55]       |
| Spain       | 2014                | adults          | biliary tract                                          | [13]       |
|             | 2015                | adults          | urinary infection                                      | [4]        |
| Thailand    | 2012                | neonate         | meningitis                                             | [56]       |

|        |      |         |                                          |      |
|--------|------|---------|------------------------------------------|------|
| Turkey | 2014 | neonate | sepsis                                   | [10] |
| India  | 2020 | adult   | bacteremia and infective<br>endocarditis | [57] |

---
