# Supplementary material for: The Identification of Streptococcus pasteurianus Obtained from Six Regions in China by Multiplex PCR Assay and the Characteristics of Pathogenicity and Antimicrobial Resistance of This Zoonotic Pathogen
Source: MDPI journal article supplement (doi:10.3390/pathogens12040615), 2023-04-18
Supplement: s1 [file s1]

Table S3. The *sodA* sequence identity (from positions 25 to 510) of positive samples with that of type strain NCTC 13784

| <b>Sample</b>   | <b><i>sodA</i> sequence identity (from positions 25 to 510)<br/>with that of type strain NCTC 13784</b> |
|-----------------|---------------------------------------------------------------------------------------------------------|
| feces-1         | 100%                                                                                                    |
| tonsil-54       | 99.18%                                                                                                  |
| tonsil-82       | 98.97%                                                                                                  |
| tonsil-KT4      | 98.93%                                                                                                  |
| tonsil-KT27     | 98.97%                                                                                                  |
| tonsil-KT35     | 99.18%                                                                                                  |
| lymphonodus-51  | 99.14%                                                                                                  |
| lymphonodus-54  | 99.18%                                                                                                  |
| lymphonodus-57  | 99.18%                                                                                                  |
| lymphonodus-58  | 99.18%                                                                                                  |
| lymphonodus-60  | 99.18%                                                                                                  |
| lymphonodus-62  | 99.13%                                                                                                  |
| lymphonodus-63  | 99.18%                                                                                                  |
| lymphonodus-64  | 98.92%                                                                                                  |
| lymphonodus-71  | 99.14%                                                                                                  |
| lymphonodus-81  | 99.13%                                                                                                  |
| lymphonodus-83  | 98.92%                                                                                                  |
| lymphonodus-86  | 98.92%                                                                                                  |
| lymphonodus-88  | 98.94%                                                                                                  |
| lymphonodus-89  | 99.13%                                                                                                  |
| lymphonodus-90  | 98.95%                                                                                                  |
| lymphonodus-96  | 98.93%                                                                                                  |
| lymphonodus-97  | 99.15%                                                                                                  |
| lymphonodus-100 | 98.95%                                                                                                  |
