# Supplementary material for: The Identification of Streptococcus pasteurianus Obtained from Six Regions in China by Multiplex PCR Assay and the Characteristics of Pathogenicity and Antimicrobial Resistance of This Zoonotic Pathogen
Source: Pathogens. 2023 Apr 18;12(4):615. doi: 10.3390/pathogens12040615 (PMC10142533; doi:10.3390/pathogens12040615)
Supplement: Supplementary file 1 [file pathogens-12-00615-s001.zip]

Archive with 4 entries (4 files):
- Table S1-pathogens-2269408.pdf
- Table S2-pathogens-2269408.pdf
- Table S3-pathogens-2269408.pdf
- Table S4-pathogens-2269408.pdf
